# Supplementary material for: Sodium borohydride hydrazinates: synthesis, crystal structures, and thermal decomposition behavior
Source: Royal Society of Chemistry journal article supplement (doi:10.1039/c5ta02276b), 2015-01-01
Supplement: c5ta02276b1.pdf [file c5ta02276b1.pdf]

## Supporting Information

### **Sodium Borohydride Hydrazinates: Synthesis, Crystal Structures, and Thermal Decomposition Behavior**

*Jianfeng Mao<sup>a\*</sup>, Qinfen Gu<sup>b</sup>, Zaiping Guo<sup>a,c\*</sup> and Hua Kun Liu<sup>a</sup>*

a Institute for Superconducting and Electronic Materials, University of Wollongong,  
NSW 2522, Australia.

b Australian Synchrotron, 800 Blackburn Rd, Clayton 3168, Australia

c School of Mechanical, Materials & Mechatronics Engineering, University of  
Wollongong, NSW 2522, Australia

\*Corresponding authors

E-mail address: [jeff.mao@hotmail.com](mailto:jeff.mao@hotmail.com), [zguo@uow.edu.au](mailto:zguo@uow.edu.au)

**Table S1.** Experimental structural parameters of the as-prepared NaBH<sub>4</sub>-2NH<sub>2</sub>NH<sub>2</sub>.

| Atom | Site | x            | y           | z           |
|------|------|--------------|-------------|-------------|
| Na1  | 4    | 0.742053(80) | 0.07764(51) | 0.94195(13) |
| N1   | 4    | 109.5868     | 110.579     | -14.29054   |
| N2   | 4    | 109.4054     | 110.5852    | -14.33902   |
| H1   | 4    | 109.63       | 110.6457    | -14.26466   |
| H2   | 4    | 109.6476     | 110.5262    | -14.22551   |
| H3   | 4    | 109.3789     | 110.6186    | -14.45992   |
| H4   | 4    | 109.3598     | 110.6112    | -14.2384    |
| N1a  | 4    | 93.93489     | 129.5682    | -133.8614   |
| N2a  | 4    | 94.09957     | 129.6015    | -133.7449   |
| H1a  | 4    | 93.93368     | 129.5158    | -133.9562   |
| H2a  | 4    | 93.88415     | 129.5198    | -133.796    |
| H3a  | 4    | 94.08598     | 129.6417    | -133.6367   |
| H4a  | 4    | 94.16396     | 129.6301    | -133.822    |
| B11  | 4    | -289.4714    | -168.2528   | 694.1873    |
| H11a | 4    | -289.5277    | -168.1908   | 694.0477    |
| H11b | 4    | -289.3435    | -168.283    | 694.1553    |
| H11c | 4    | -289.464     | -168.2013   | 694.3476    |
| H11d | 4    | -289.5557    | -168.3338   | 694.1908    |

**Table S2.** Interatomic distances (Å) in crystal structure of NaBH<sub>4</sub>-2NH<sub>2</sub>NH<sub>2</sub> at room temperature.

|         |        |
|---------|--------|
| Na1- N1 | 2.3461 |
| N2a     | 2.6082 |
| N2      | 2.6200 |
| N1a     | 2.7623 |
| B11     | 2.9782 |
| B11     | 3.3544 |
| Na1-H2a | 2.2163 |
| H11a    | 2.3561 |
| H1      | 2.3985 |
| H11b    | 2.4794 |
| H2      | 2.4929 |
| H3      | 2.6016 |
| H3a     | 2.8925 |
| H11d    | 2.9362 |
| H4a     | 2.9781 |
| H4      | 3.0703 |
